# Supplementary material for: Length of FMR1 repeat alleles within the normal range does not substantially affect the risk of early menopause
Source: PubMed Central journal article supplement (PMC5027929; doi:10.1093/humrep/dew204), 2016-09-17
Supplement: supp_dew204_dew204supp_table1.pdf [file supp_dew204_dew204supp_table1.pdf]

**Supplementary Table S1** Relationship of *FMR1* allele length with early menopause in matched cases and controls (*n* = 3118).

| Model                         | Variables included                  | OR    | 95% LCL | 95% UCL | SE    | P            |
|-------------------------------|-------------------------------------|-------|---------|---------|-------|--------------|
| Allele 1 (cont.)              | Allele 1 (cont.)                    | 1.012 | 0.997   | 1.028   | 0.008 | 0.116        |
| Allele 1, categorical nominal | 1. low                              | 0.913 | 0.792   | 1.052   | 0.066 | 0.207        |
|                               | 2. medium (ref.)                    | ref.  | ref.    | ref.    | ref.  | ref.         |
|                               | 3. high                             | 2.339 | 0.968   | 5.651   | 1.053 | 0.059        |
| Allele 1, categorical ordinal | (1) low,<br>(2) medium,<br>(3) high | 1.129 | 0.983   | 1.296   | 0.079 | 0.086        |
| Allele 2 (cont.)              | Allele 2 (cont.)                    | 1.004 | 0.989   | 1.020   | 0.008 | 0.574        |
| Allele 2, categorical nominal | 1. low                              | 0.721 | 0.524   | 0.991   | 0.117 | <b>0.044</b> |
|                               | 2. medium (ref.)                    | ref.  | ref.    | ref.    | ref.  | ref.         |
|                               | 3. high                             | 0.963 | 0.790   | 1.174   | 0.097 | 0.712        |
| Allele 2, categorical ordinal | (1) low,<br>(2) medium,<br>(3) high | 1.075 | 0.917   | 1.261   | 0.087 | 0.372        |

The value in bold is significant at  $P < 0.05$ ; cont, continuous; LCL, lower limit of 95% confidence interval; OR, odds ratio; ref., reference category; SE, standard error; UCL, upper limit of 95% confidence interval.
