# Supplementary material for: Length of FMR1 repeat alleles within the normal range does not substantially affect the risk of early menopause
Source: PubMed Central journal article supplement (PMC5027929; doi:10.1093/humrep/dew204), 2016-09-17
Supplement: supp_dew204_dew204supp_table2.pdf [file supp_dew204_dew204supp_table2.pdf]

**Supplementary Table SII Relationship of *FMR1* genotype with early menopause in matched cases and controls (n = 3118).**

| Model                                      | Variables included                                                                                                 | OR                                                                                                                 | 95% LCL | 95% UCL | SE    | P            |       |
|--------------------------------------------|--------------------------------------------------------------------------------------------------------------------|--------------------------------------------------------------------------------------------------------------------|---------|---------|-------|--------------|-------|
| Allele 1 and Allele 2 (cont.)              | Allele 1 (cont.)                                                                                                   | 1.012                                                                                                              | 0.996   | 1.029   | 0.009 | 0.143        |       |
|                                            | Allele 2 (cont.)                                                                                                   | 1.000                                                                                                              | 0.984   | 1.017   | 0.008 | 0.977        |       |
| Allele 1, Allele 2 and interaction (cont.) | Allele 1 (cont.)                                                                                                   | 1.017                                                                                                              | 0.927   | 1.115   | 0.048 | 0.726        |       |
|                                            | Allele 2 (cont.)                                                                                                   | 1.004                                                                                                              | 0.930   | 1.083   | 0.039 | 0.926        |       |
|                                            | Allele 1 × Allele 2 (interaction)                                                                                  | 1.000                                                                                                              | 0.997   | 1.003   | 0.001 | 0.929        |       |
| Genotype, categorical nominal              | 1. low/low                                                                                                         | 0.695                                                                                                              | 0.502   | 0.961   | 0.115 | <b>0.028</b> |       |
|                                            | 2. low/medium                                                                                                      | 0.915                                                                                                              | 0.778   | 1.075   | 0.075 | 0.279        |       |
|                                            | 3. low/high                                                                                                        | 0.953                                                                                                              | 0.651   | 1.395   | 0.185 | 0.804        |       |
|                                            | 4. medium/ medium (ref.)                                                                                           | ref.                                                                                                               | ref.    | ref.    | ref.  | ref.         |       |
|                                            | 5. medium/high                                                                                                     | 0.861                                                                                                              | 0.677   | 1.095   | 0.105 | 0.222        |       |
|                                            | 6. high/high                                                                                                       | 2.292                                                                                                              | 0.947   | 5.545   | 1.033 | 0.066        |       |
| Genotype, categorical ordinal (order 1)    | (1) low/low,<br>(2) low/medium,<br>(3) low/high,<br>(4) medium/medium (ref.),<br>(5) medium/high,<br>(6) high/high | 1.049                                                                                                              | 0.990   | 1.112   | 0.031 | 0.104        |       |
|                                            | Genotype, categorical ordinal (order 2)                                                                            | (1) low/low,<br>(2) low/medium,<br>(3) medium/medium (ref.),<br>(4) low/high,<br>(5) medium/high,<br>(6) high/high | 1.042   | 0.973   | 1.115 | 0.036        | 0.239 |

The value in bold is significant at  $P < 0.05$ .
