# Supplementary material for: Length of FMR1 repeat alleles within the normal range does not substantially affect the risk of early menopause
Source: PubMed Central journal article supplement (PMC5027929; doi:10.1093/humrep/dew204), 2016-09-17
Supplement: supp_dew204_dew204supp_table3.pdf [file supp_dew204_dew204supp_table3.pdf]

**Supplementary Table SIII Relationship of *FMRI* allele length with age at menopause as a quantitative trait in controls ( $n = 1,687^a$ ).**

| Model                         | Variables included                  | Beta <sup>b</sup> | 95% LCL | 95% UCL | SE    | P     |
|-------------------------------|-------------------------------------|-------------------|---------|---------|-------|-------|
| Allele 1 (cont.)              | Allele 1 (cont.)                    | 0.007             | -0.004  | 0.018   | 0.006 | 0.207 |
| Allele 1, categorical nominal | 1. low                              | -0.028            | -0.125  | 0.068   | 0.049 | 0.564 |
|                               | 2. medium (ref.)                    | ref.              | ref.    | ref.    | ref.  | ref.  |
|                               | 3. high                             | -0.009            | -0.750  | 0.733   | 0.378 | 0.982 |
| Allele 1, categorical ordinal | (1) low,<br>(2) medium,<br>(3) high | 0.028             | -0.067  | 0.122   | 0.048 | 0.569 |
| Allele 2 (cont.)              | Allele 2 (cont.)                    | -0.001            | -0.011  | 0.009   | 0.005 | 0.810 |
| Allele 2, categorical nominal | 1. low                              | -0.090            | -0.290  | 0.110   | 0.102 | 0.375 |
|                               | 2. medium (ref.)                    | ref.              | ref.    | ref.    | ref.  | ref.  |
|                               | 3. high                             | -0.032            | -0.164  | 0.100   | 0.067 | 0.630 |
| Allele 2, categorical ordinal | (1) low,<br>(2) medium,<br>(3) high | 0.007             | -0.097  | 0.111   | 0.053 | 0.894 |

<sup>a</sup>528 controls were pre-menopausal but aged  $\geq 46$  years and so were not included in this analysis.

<sup>b</sup>Effect size is in standard deviations of inverse-normally transformed age at menopause.
