# Supplementary material for: Length of FMR1 repeat alleles within the normal range does not substantially affect the risk of early menopause
Source: PubMed Central journal article supplement (PMC5027929; doi:10.1093/humrep/dew204), 2016-09-17
Supplement: supp_dew204_dew204supp_table4.pdf [file supp_dew204_dew204supp_table4.pdf]

**Supplementary Table SIV Relationship of *FMRI* genotype with age at menopause as a quantitative trait in controls (n = 1687<sup>a</sup>).**

| Model                                      | Variables included                                                                                                 | Beta <sup>b</sup> | 95% LCL | 95% UCL | SE    | P     |
|--------------------------------------------|--------------------------------------------------------------------------------------------------------------------|-------------------|---------|---------|-------|-------|
| Allele 1 and Allele 2 (cont.)              | Allele 1 (cont.)                                                                                                   | 0.008             | -0.003  | 0.020   | 0.006 | 0.161 |
|                                            | Allele 2 (cont.)                                                                                                   | -0.004            | -0.014  | 0.007   | 0.005 | 0.513 |
| Allele 1, Allele 2 and interaction (cont.) | Allele 1 (cont.)                                                                                                   | 0.019             | -0.049  | 0.087   | 0.035 | 0.590 |
|                                            | Allele 2 (cont.)                                                                                                   | 0.005             | -0.051  | 0.061   | 0.029 | 0.860 |
|                                            | Allele 1 × Allele 2 (interaction)                                                                                  | 0.000             | -0.002  | 0.002   | 0.001 | 0.760 |
| Genotype, categorical nominal              | 1. low/low                                                                                                         | -0.102            | -0.307  | 0.103   | 0.105 | 0.330 |
|                                            | 2. low/medium                                                                                                      | -0.028            | -0.137  | 0.082   | 0.056 | 0.621 |
|                                            | 3. low/high                                                                                                        | -0.029            | -0.277  | 0.219   | 0.126 | 0.819 |
|                                            | 4. medium/medium (ref.)                                                                                            | ref.              | ref.    | ref.    | ref.  | ref.  |
|                                            | 5. medium/high                                                                                                     | -0.050            | -0.209  | 0.109   | 0.081 | 0.536 |
|                                            | 6. high/high                                                                                                       | -0.018            | -0.761  | 0.724   | 0.379 | 0.961 |
| Genotype, categorical ordinal (order 1)    | (1) low/low,<br>(2) low/medium,<br>(3) low/high,<br>(4) medium/medium (ref.),<br>(5) medium/high,<br>(6) high/high | 0.011             | -0.029  | 0.050   | 0.020 | 0.600 |
| Genotype, categorical ordinal (order 2)    | (1) low/low,<br>(2) low/medium,<br>(3) medium/medium (ref.),<br>(4) low/high,<br>(5) medium/high,<br>(6) high/high | 0.005             | -0.041  | 0.051   | 0.024 | 0.841 |

<sup>a</sup>528 controls were pre-menopausal but aged ≥46 years and so were not included in this analysis.

<sup>b</sup>Effect size is in standard deviations of inverse-normally transformed age at menopause.
